# Supplementary material
Source: publisher site journal article supplement (https://www.dovepress.com/article/377336)

**Antibacterial and Antioxidant Activities, *In Silico* Molecular Docking, ADMET and DFT Analysis of Compounds from roots of *Cyphostemma cyphopetalum***

**Teshome Degfie<sup>1</sup>, Japheth O. Ombito<sup>2</sup>, Taye B. Demissie<sup>2</sup>, Rajalakshmanan Eswaramoorthy<sup>3</sup>, Aman Dekebo<sup>1,4</sup>, Milkyas Endale<sup>1\*</sup>**

**Correspondence: Milkyas Endale, Teshome Degfie**

Department of Applied Chemistry, Adama Science and Technology University, P.O. Box 1888, Adama, Ethiopia

Email [milkyas.endale@astu.edu.et](mailto:milkyas.endale@astu.edu.et) , [teshome2degfie@yahoo.com](mailto:teshome2degfie@yahoo.com)

The NMR data used to establish the structures of the compounds isolated in this work are depicted as Supplementary information.

Supplementary Tables 1-7 display the tabulated spectra used to determine the structure of compounds **2-8**, respectively.

Supplementary Figures 1-6 display the spectra used to determine the structure of newly obtained spongiane diterpenoid lactone hydroxyl derivatives, 3-hydroxyisoagatholactone (**1**).

**Supplementary Table 1**  $^1\text{H}$  (400 MHz,  $\text{CDCl}_3$ ),  $^{13}\text{C}$  and DEPT-135 NMR spectra of compound **2**

| Compound 2 |                  |                 | <sup>40</sup>   |
|------------|------------------|-----------------|-----------------|
| No         | $^1\text{H}$ (J) | $^{13}\text{C}$ | $^{13}\text{C}$ |
| 1          |                  | 37.2            | 37.2            |
| 2          |                  | 31.6            | 31.6            |
| 3          | 3.50 (m, 1H)     | 71.9            | 71.8            |
| 4          | 2.31 (d, 2H)     | 42.2            | 42.2            |
| 5          |                  | 140.8           | 140.7           |
| 6          | 5.33 (bs, 1H)    | 121.8           | 121.7           |
| 7          | 2.04 (m, 2H)     | 32.0            | 31.9            |
| 8          |                  | 32.0            | 31.9            |
| 9          |                  | 50.2            | 50.1            |
| 10         |                  | 36.6            | 36.5            |
| 11         |                  | 21.1            | 21.0            |
| 12         |                  | 39.8            | 39.7            |
| 13         |                  | 42.4            | 42.3            |
| 14         |                  | 56.8            | 56.7            |
| 15         |                  | 24.8            | 24.3            |
| 16         |                  | 28.2            | 29.7            |
| 17         |                  | 56.1            | 56.0            |
| 18         | 0.66 (s, 3H)     | 11.9 C          | 12.2            |
| 19         | 0.86 (m, 3H)     | 19.1            | 19.4            |
| 20         |                  | 36.2            | 36.5            |
| 21         | 0.99(m, 3H)      | 18.8            | 18.9            |
| 22         |                  | 34.0            | 33.9            |
| 23         |                  | 26.1            | 26.2            |
| 24         |                  | 45.9            | 45.8            |
| 25         |                  | 29.2            | 29.1            |
| 26         | 0.83 (m, 3H)     | 19.9            | 19.8            |
| 27         | 0.79 (m, 3H)     | 19.5            | 19.4            |
| 28         |                  | 23.1            | 23.0            |
| 29         | 0.81 (m, 3H)     | 12.0            | 12.2            |

**Supplementary Table 2**  $^1\text{H}$  (400 MHz, MeOD),  $^{13}\text{C}$ , COSY, HSQC and HMBC spectra of compound **3**

| Compound 3 |                       |                 |         |                   | 41,42            |                 |
|------------|-----------------------|-----------------|---------|-------------------|------------------|-----------------|
| No         | $^1\text{H}$ (J)      | $^{13}\text{C}$ | COSY    | HMBC              | $^1\text{H}$ (J) | $^{13}\text{C}$ |
| 1          |                       | 133.8           |         |                   |                  | 134.4           |
| 2, 6       | 7.16 (d, 8.6Hz, 2H)   | 128.2           | H-3,5   | C-4, 3/5          | 7.14 (d, 9.0 Hz) | 128.7           |
| 3, 5       | 6.79 (d, 8.6Hz, 2H)   | 116.3           | H-2,6   | C-1, 4,           | 6.76 (d, 9.0 Hz) | 116.8           |
| 4          |                       | 159.4           |         |                   |                  | 158.9           |
| 7          | 5.39 (d, 6.6 Hz, 1H)  | 94.8            |         | C-1, 8,           | 5.36 (d, 6.5 Hz) | 95.3            |
| 8          | 4.37 (d, 6.6 Hz, 1H)  | 58.2            | H-10/14 | C-1, 7, 9, 11'    | 4.35 (d, 6.5 Hz) | 58.8            |
| 9          |                       | 147.3           |         |                   |                  | 147.9           |
| 10, 14     | 6.19 (d, 3.0 Hz, 2H)  | 107.6           |         | C-8               | 6.16 (d, 2.0 Hz) | 108.0           |
| 11, 13     |                       | 159.9           |         |                   |                  | 160.5           |
| 12         | 6.18 (d, 2.0 Hz, 1H)  | 102.2           |         |                   | 6.18 (t, 2.0 Hz) | 102.7           |
| 1'         |                       | 131.1           |         |                   |                  | 130.8           |
| 2', 6'     | 7.06 (d, 8.7 Hz, 2H)  | 128.8           |         | C-4, 3'/5'        | 7.03 (d, 9.0 Hz) | 129.3           |
| 3', 5'     | 6.67 (d, 8.8 Hz, 2H)  | 116.3           |         | C-4', C2'/6'      | 6.65 (d, 9.0 Hz) | 116.9           |
| 4'         |                       | 158.3           |         |                   |                  | 159.0           |
| 7'         | 6.84 (d, 16.4 Hz, 1H) | 130.3           | H-8'    | C-2'/6', 8'       | 6.81(d, 16.0 Hz) | 130.9           |
| 8'         | 6.59 (d, 16.5 Hz, 1H) | 123.6           | H-7'    | C-1', 7', 9', 14' | 6.56(d, 16.0 Hz) | 124.2           |
| 9'         |                       | 136.8           |         |                   |                  | 137.4           |
| 10'        |                       | 120.0           |         |                   |                  | 120.6           |
| 11'        |                       | 162.7           |         |                   |                  | 163.2           |
| 12'        | 6.25 (s, 1H)          | 96.8            |         | C-9',             | 6.25 (d, 2.0 Hz) | 97.4            |
| 13'        |                       | 159.7           |         |                   |                  | 160.2           |
| 14'        | 6.63 (s, 1H)          | 104.3           |         | C-7', 9',         | 6.63 (d, 2.0 Hz) | 104.9           |

**Supplementary Table 3**  $^1\text{H}$  (400 MHz, MeOD), and  $^{13}\text{C}$  spectra of compound **4**.

| Compound 4 |                               |                   | 43,44            |                     |
|------------|-------------------------------|-------------------|------------------|---------------------|
| No         | $^1\text{H}$ (J)              | $^{13}\text{C}$ , | $^1\text{H}$ NMR | $^{13}\text{C}$ NMR |
| 1          | -                             | 130.4             | -                | 128.07              |
| 2, 6       | $\delta$ 7.35 (d, 8.4 Hz, 2H) | 128.7             | 7.35 (d)         | 127.75              |
| 3, 5       | 6.77 (d, 8.5 Hz, 2H)          | 116.4             | 6.71 (d)         | 115.43              |
| 4          |                               | 158.2             |                  | 157.16              |
| 1''        | 6.96 (d, 16.3 Hz, 1H)         | 129.3             | 6.87 (d)         | 128.02              |
| 2''        | 6.80 (d, 16.3 Hz, 1H)         | 126.9             | 6.76 (d)         | 125.60              |
| 1'         | -                             | 141.2             | -                | 139.19              |
| 2', 6'     | 6.45 (d, 2.1 Hz, 2H)          | 105.7             | 6.34 (brs)       | 104.23              |
| 3', 5'     |                               | 159.6             |                  | 158.28              |
| 4'         | 6.16 (bs, 1H)                 | 102.6             | 6.07 (brs)       | 101.67              |
| 4-OH       | 9.29 (OH)                     | OH                | 9.48 (OH)        |                     |
| 3', 5'-OH  | 9.11 (OH)                     | OH                | 9.12 (OH)        |                     |

**Supplementary Table 4**  $^1\text{H}$  (400 MHz, MeOD),  $^{13}\text{C}$ , COSY, and HMBC spectra of compound 5

| Compound 5 |                          |                 |             |             | 45,46               |                 |
|------------|--------------------------|-----------------|-------------|-------------|---------------------|-----------------|
| No         | $^1\text{H}$ (J)         | $^{13}\text{C}$ | COSY        | HMBC        | $^1\text{H}$ (J)    | $^{13}\text{C}$ |
| 1          |                          | 136.9           |             |             |                     | 134.7           |
| 2, 6       | 7.15 (d, 8.6 Hz, 2H)     | 127.6           | H-3/5       | C-3/5, 7    | 7.18 (d, 8.5)       | 128.6           |
| 3, 5       | 6.77 (d, 8.6 Hz, 2H)     | 116.4           |             |             | 6.79 (d, 8.5)       | 116.9           |
| 4          |                          | 158.4           |             |             |                     | 159.0           |
| 7          | 5.37 (d, 6.6 Hz, 1H)     | 94.9            | H-8         | C-2/6, 8, 9 | 5.40 (d, 5.5)       | 95.3            |
| 8          | 4.35 (d, 6.6 Hz, 1H)     | 58.3            |             | C-9,14/10'  | 4.40 (d, 5.5)       | 59.4            |
| 9          |                          | 147.3           |             |             |                     | 148.0           |
| 10, 14     | 6.17 (d, 2.3 Hz, 2H)     | 107.0           | H-14        | C-9,        | 6.14 (s)            | 107.8           |
| 11, 13     |                          | 159.7           |             |             |                     | 160.6           |
| 12         | 6.24 (s, 1H)             | 101.5           | H-10/14     |             | 6.14 (s)            | 102.7           |
| 1'         |                          | 133.8           |             |             |                     | 131.1           |
| 2', 6'     | 6.92 (d, 8.4 Hz, 2H)     | 130.5           | H-3'/5'     |             | 6.69 (d, 8.5)       | 129.2           |
| 3' 5'      | 6.72 (d, 8.6 Hz, 2H)     | 115.7           |             | C-2'/3',7'  | 6.51 (d, 8.5)       | 116.7           |
| 4'         |                          | 158.4           |             |             |                     | 158.8           |
| 7'         | 6.82 (d, 16.4 Hz, 1H)    | 130.4           | H-8'        | C-8',9'     | 6.38 (s)            | 129.2           |
| 8'         | 6.58 (d, 16.9 Hz, 1H)    | 123.7           |             | C-1',14'    |                     | 123.0           |
| 9'         |                          | 133.9           |             |             |                     | 135.0           |
| 10'        |                          | 120.0           |             |             |                     | 120.8           |
| 11'        |                          | 160.0           |             |             |                     | 163.5           |
| 12'        | 6.18 (s, 1H)             | 96.6            |             |             | 6.42 (s)            | 92.0            |
| 13'        |                          | 162.8           |             |             |                     | 163.5           |
| 14'        |                          | 120.3           |             |             |                     | 120.8           |
| 1''        |                          | 137.8           |             |             |                     | 134.2           |
| 2'', 6''   | 7.04 (d, 8.8 Hz, 2H)     | 128.3           | H-3''/5''   | C-3''/5''   | 7.18(dd, 2.0, 8.5)  | 128.6           |
| 3'', 5''   | 6.66 (d, 8.6 Hz, 2H).    | 116.2           |             |             | 6.78 (dd, 2.0, 8.5) | 116.9           |
| 4''        |                          | 157.8           |             |             |                     | 159.0           |
| 7''        | 5.19 (d, 6.2 Hz, 1H)     | 94.8            | H-8''       | C-1'',8'',9 | 5.40 (d, 5.5)       | 95.3            |
| 8''        | 3.79 (d, 6.4 Hz, 1H)     | 57.7            |             | C-7'',9''   | 4.40 (d, 5.5)       | 59.4            |
| 9''        |                          | 147.4           |             |             |                     | 148.0           |
| 10'', 14'' | 5.93 (d, 2.2 Hz, 2H)     | 106.7           | H-10,14''   | C-9'',8''   | 6.14 (s)            | 107.8           |
| 11'', 13'' |                          | 158.5           |             |             |                     | 160.6           |
| 12''       | 6.18(dd, 6.8, 2.3Hz, 1H) | 101.8           | H-10''/14'' |             | 6.14 (s)            | 102.7           |

**Supplementary Table 5**  $^1\text{H}$  (400 MHz, MeOD),  $^{13}\text{C}$ , COSY, and HMBC spectra of compound **6**

| Compound 6        |                         |                   |                 |                              | 47,48                 |                 |
|-------------------|-------------------------|-------------------|-----------------|------------------------------|-----------------------|-----------------|
| No                | $^1\text{H}$ (J)        | $^{13}\text{C}$ , | COSY            | HMBC                         | $^1\text{H}$          | $^{13}\text{C}$ |
| 1, 1'             |                         | 133.9             |                 |                              |                       | 131.7           |
| 2/6,<br>2'/6'     | 7.27 (d, 8.4 Hz,<br>4H) | 128.8             | H-3/5;<br>3'/5' | C-4/7; C-<br>4'/7'           | 7.17 d (8.4)          | 128.1           |
| 3/5,<br>3'/5'     | 6.76 (d, 8.4 Hz,<br>4H) | 116.1             |                 | C-1; C-1'                    | 6.64 d (8.4)          | 114.2           |
| 4, 4'             |                         | 158.0             |                 |                              |                       | 155.9           |
| 7, 7'             | 5.40 (d, 4.4 Hz,<br>2H) | 85.9              | H-8, 8'         | C-2/6; C-<br>2'/6'           | 5.82 d (4.4)          | 83.6            |
| 8, 8'             | 3.58 (d, 4.4 Hz,<br>2H) | 59.0              |                 | C-9, 10/14;<br>C-9', 10'/14' | 3.84 dd<br>(4.4, 6.2) | 59.2            |
| 9, 9'             |                         | 142.1             |                 |                              |                       | 142.6           |
| 10/14;<br>10'/14' | 6.02 (s, 4H)            | 109.0             |                 | C-8, 12; C-<br>8', 12'       | 6.08 d (2.2)          | 108.0           |
| 11/13;<br>11'/13' |                         | 158.8             |                 |                              |                       | 157.7           |
| 12, 12'           | 6.23 (bs, 2H)           | 101.8             |                 |                              | 6.05 t (2.2)          | 100.5           |

**Supplementary Table 6**  $^1\text{H}$  (400 MHz, MeOD), and  $^{13}\text{C}$  spectra of compound **7**

| No     | Compound 7             |                 | 49                     |                 |
|--------|------------------------|-----------------|------------------------|-----------------|
|        | $^1\text{H}(\text{J})$ | $^{13}\text{C}$ | $^1\text{H}(\text{J})$ | $^{13}\text{C}$ |
| 1      |                        | 137.8           |                        | 134.2           |
| 2, 6   | 6.93 (d, 8.5 Hz, 2H)   | 131.1           | 7.15 (d, 8.4)          | 128.7           |
| 3, 5   | 6.58 (d, 8.5 Hz, 2H)   | 116.2           | 6.83 (d, 8.4)          | 116.5           |
| 4      |                        | 158.4           |                        | 159.1           |
| 7      | 5.18 (d, 6.2 Hz, 1H)   | 94.9            | 5.35 (d, 5.1)          | 93.7            |
| 8      | 3.78 (d, 6.2 Hz, 1H)   | 57.5            | 4.4 (d, 5.1)           | 56.9            |
| 9      |                        | 147.4           |                        | 148.0           |
| 10, 14 | 5.93 (d, 2.2 Hz, 2H)   | 107.3           | 6.04 (d, 2.2)          | 106.9           |
| 11, 13 |                        | 160.1           |                        | 160.0           |
| 12     | 6.09 (brs, 1H)         | 101.8           | 6.04 (, 2.2)           | 102.0           |
| 1'     |                        | 131.1           |                        | 131.2           |
| 2', 6' | 7.14 (d, 8.6 Hz, 2H)   | 128.5           | 6.93 (d, 8.4)          | 127.5           |
| 3', 5' | 6.71 (d, 8.6 Hz, 2H)   | 115.9           | 6.65 (d, 8.4)          | 115.4           |
| 4'     |                        | 157.8           |                        | 158.0           |
| 7'     | 4.07 (d, 6.6 Hz, 1H)   | 72.9            | 4.93 (d, 8.7)          | 75.3            |
| 8'     | 4.07 (d, 6.6 Hz, 1H)   | 73.2            | 4.58 (d, 8.7)          | 76.5            |
| 9'     |                        | 146.8           |                        | 134.6           |
| 10'    |                        | 126.6           |                        | 119.2           |
| 11'    |                        | 162.8           |                        | 161.9           |
| 12'    | 6.23 (d, 2.2 Hz, 1H)   | 96.8            | 6.37 (d, 2.2)          | 96.7            |
| 13'    |                        | 159.6           |                        | 159.1           |
| 14'    | 6.53 (brs, 1H)         | 107.7           | 6.67 (d, 2.2)          | 108.2           |

**Supplementary Table 7**  $^1\text{H}$  (400 MHz, MeOD),  $^{13}\text{C}$ , COSY, HSQC and HMBC spectra of compound **8**

| Compound 8       |                                  |                 |          |                | 6                   |                 |
|------------------|----------------------------------|-----------------|----------|----------------|---------------------|-----------------|
| No               | $^1\text{H}$ (J)                 | $^{13}\text{C}$ | COSY     | HMBC           | $^1\text{H}$        | $^{13}\text{C}$ |
| 1                |                                  | 131.2           |          |                |                     | 131.3           |
| 2, 6             | 7.30 (d, $J = 8.6$ Hz, 2H)       | 128.8           | H-3, 5   | C-7            | 7.05 (d, 8.5)       | 129.9           |
| 3, 5             | 6.79 (d, $J = 8.6$ Hz, 2H)       | 116.1           | H-2, 6   |                | 6.82 (d, 8.5)       | 115.2           |
| 4                |                                  | 157.4           |          |                |                     | 157.4           |
| 7                | 5.43 (d, $J = 6.6$ Hz, 1H)       | 85.9            | H-8      | C-1, 2,6       | 4.30 (d, 8.0)       | 86.9            |
| 8                | 3.59 (dd, $J = 6.6, 6.3$ Hz, 1H) | 59.1            | H-7      | C-14           | 3.42 (dd, 8.4, 3.5) | 60.7            |
| 9                |                                  | 142.2           |          |                |                     | 146.3           |
| 10               |                                  | 125.6           |          |                |                     | 122.7           |
| 11               |                                  | 158.1           |          |                |                     | 154.5           |
| 12               | 6.17 (d, $J = 2.4$ Hz, 1H)       | 103.6           | H-10/14  |                | 6.27 (d, 2.0)       | 102.0           |
| 13               |                                  | 159.4           |          |                |                     | 158.1           |
| 14               | 6.25 (d, $J = 2.4$ Hz, 1H)       | 106.9           |          |                | 5.74 (d, 1.8)       | 105.3           |
| 1'               |                                  | 133.9           |          |                |                     | 137.4           |
| 2', 6'           | 6.97 (d, $J = 8.6$ Hz, 2H)       | 128.8           | H-3', 5' |                | 6.89 (d, 8.4)       | 128.8           |
| 3', 5'           | 6.71 (d, $J = 8.6$ Hz, 2H)       | 116.1           |          | C-1', 7'       | 6.77 (d, 8.6)       | 115.1           |
| 4'               |                                  | 156.5           |          |                |                     | 155.9           |
| 7'               | 4.10 (d, $J = 6.5$ Hz, 1H)       | 55.6            |          | C-1', 8'       | 3.93 (d, 3.0)       | 55.2            |
| 8'               | 4.20 (dd, $J = 6.6, 6.3$ Hz, 1H) | 61.0            |          | C-1', 9'       | 3.46 (t, 3.5)       | 58.8            |
| 9'               |                                  | 150.3           |          |                |                     | 150.5           |
| 10', 14'         | 6.05 (s, 2H)                     | 109.0           |          | C-8'           | 6.09 (d, 1.8)       | 105.8           |
| 11', 13'         |                                  | 158.9           |          |                |                     | 158.9           |
| 12'              | 6.14 (d, $J = 2.0$ Hz, 1H)       | 101.8           |          | C-10', 14', 8' | 6.20 (d, 1.8)       | 100.7           |
| OCH <sub>3</sub> | 3.58 (d, $J = 4.8$ Hz, 3H)       | 59.1            |          | C-10', 14'     | 2.96 (3H, s)        | 55.8            |



Supplementary Figure 1 <sup>1</sup>H NMR spectra of compound 1.

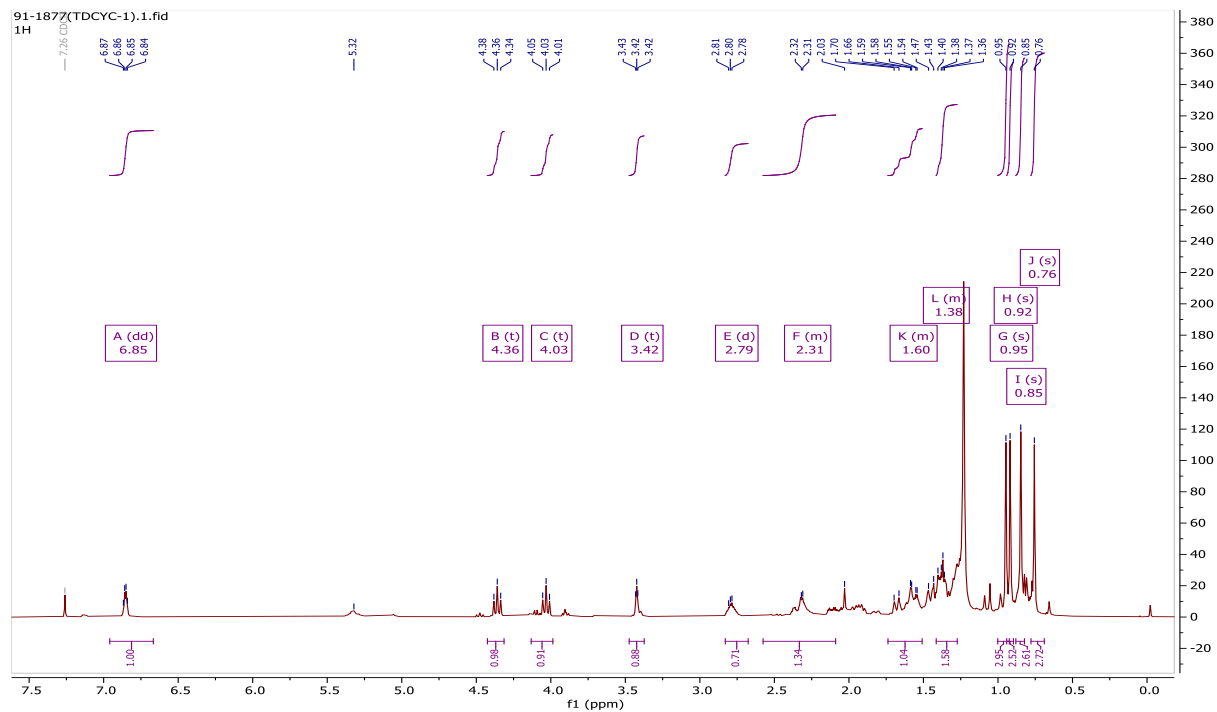

## Supplementary Figure 2 13C NMR spectra of compound 1.

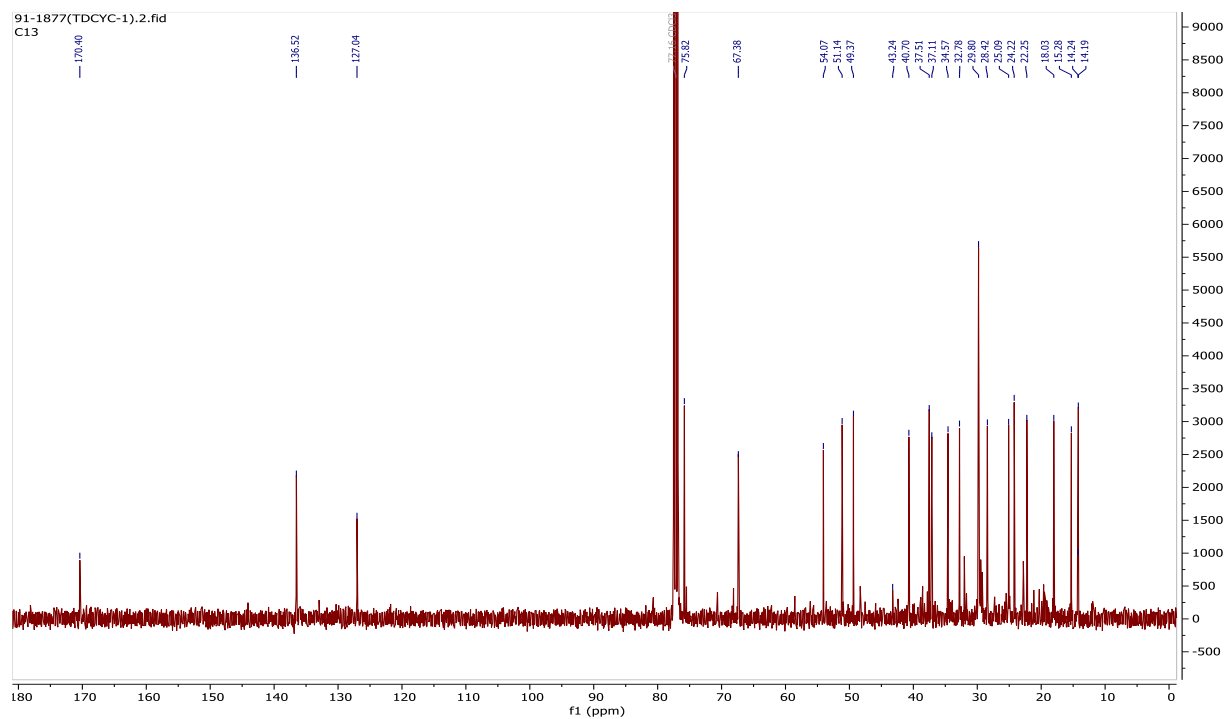

### Supplementary Figure 3 DEPT-135 NMR spectra of compound 1.

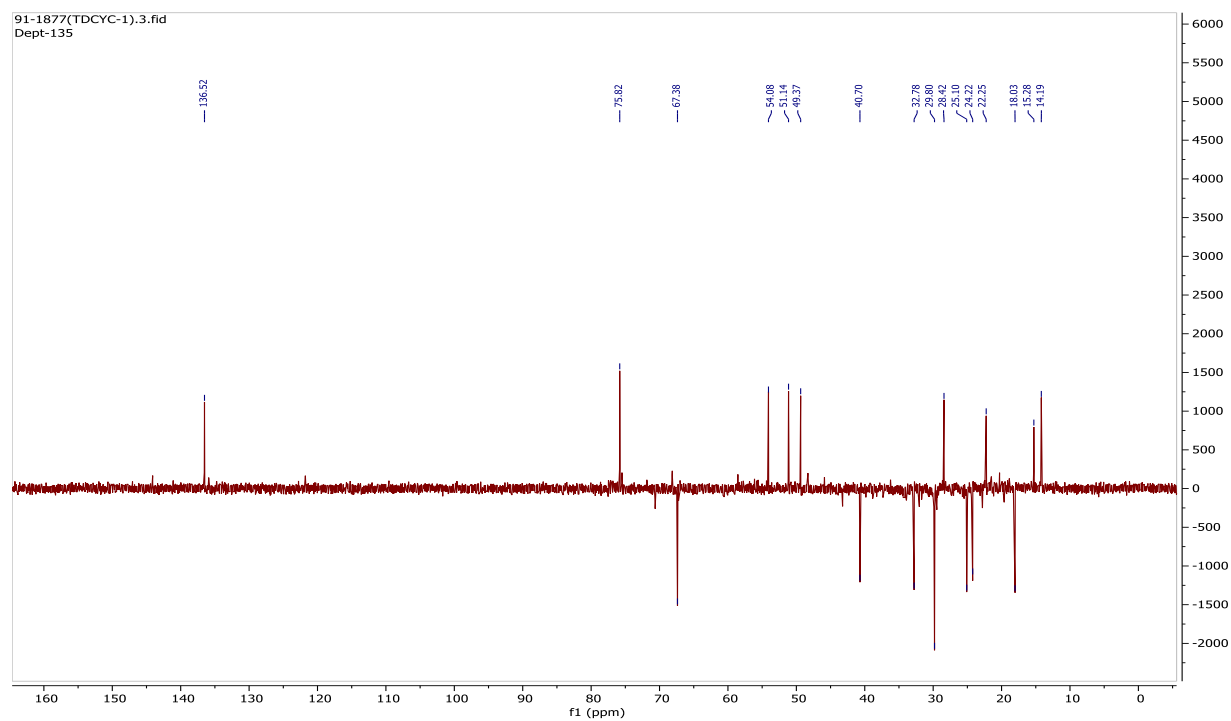

Supplementary Figure 4 COSY spectrum of compound 1.

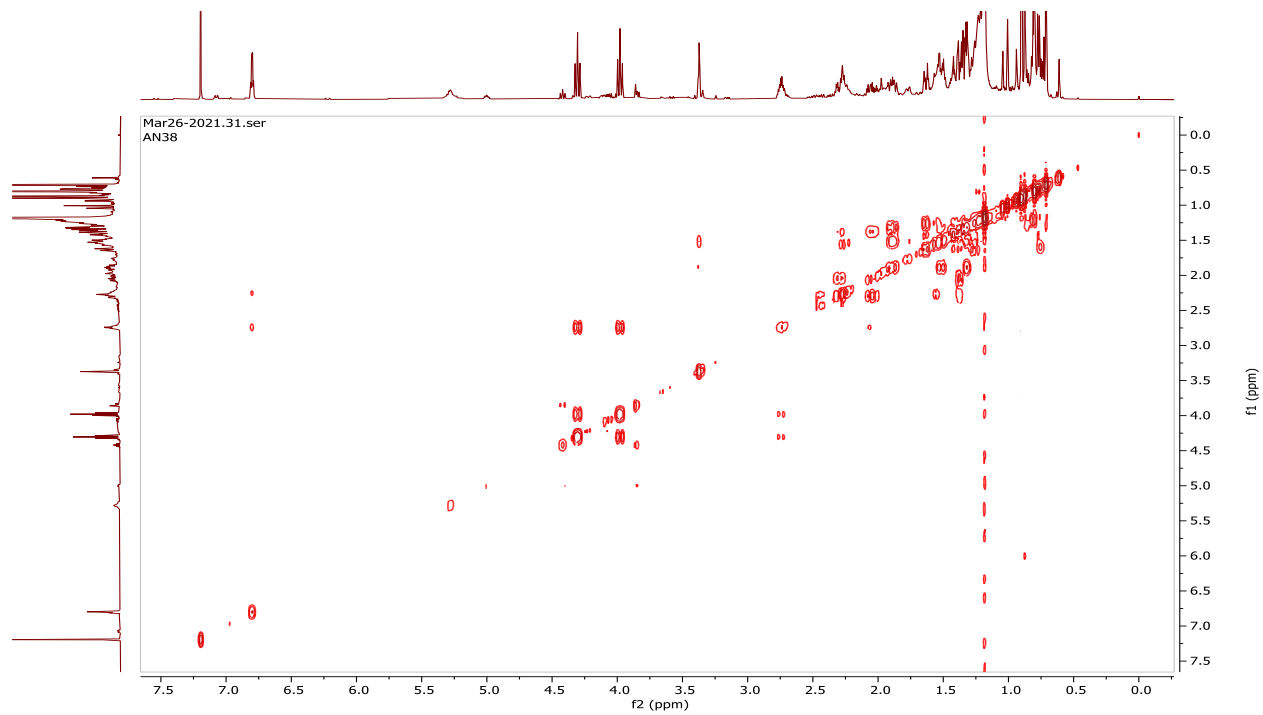

Supplementary Figure 5 HSQC spectrum of compound 1.

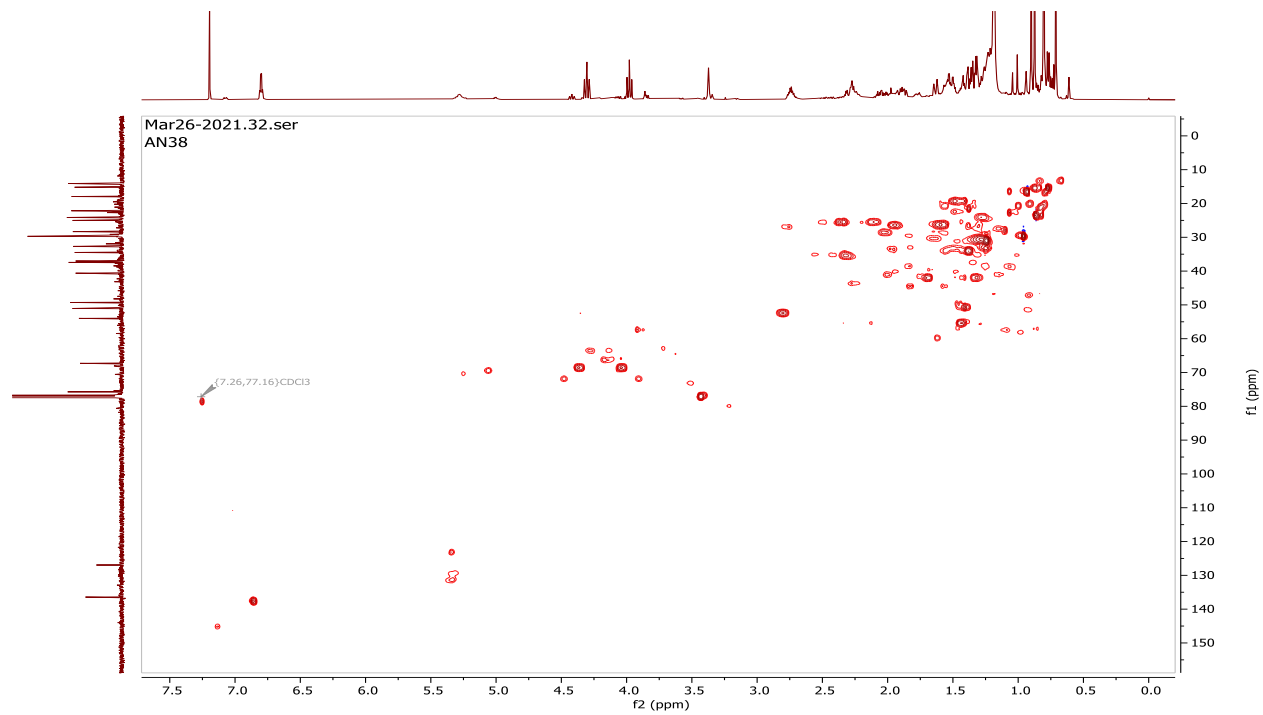

Supplementary Figure 6 HMBC spectra of compound 1.

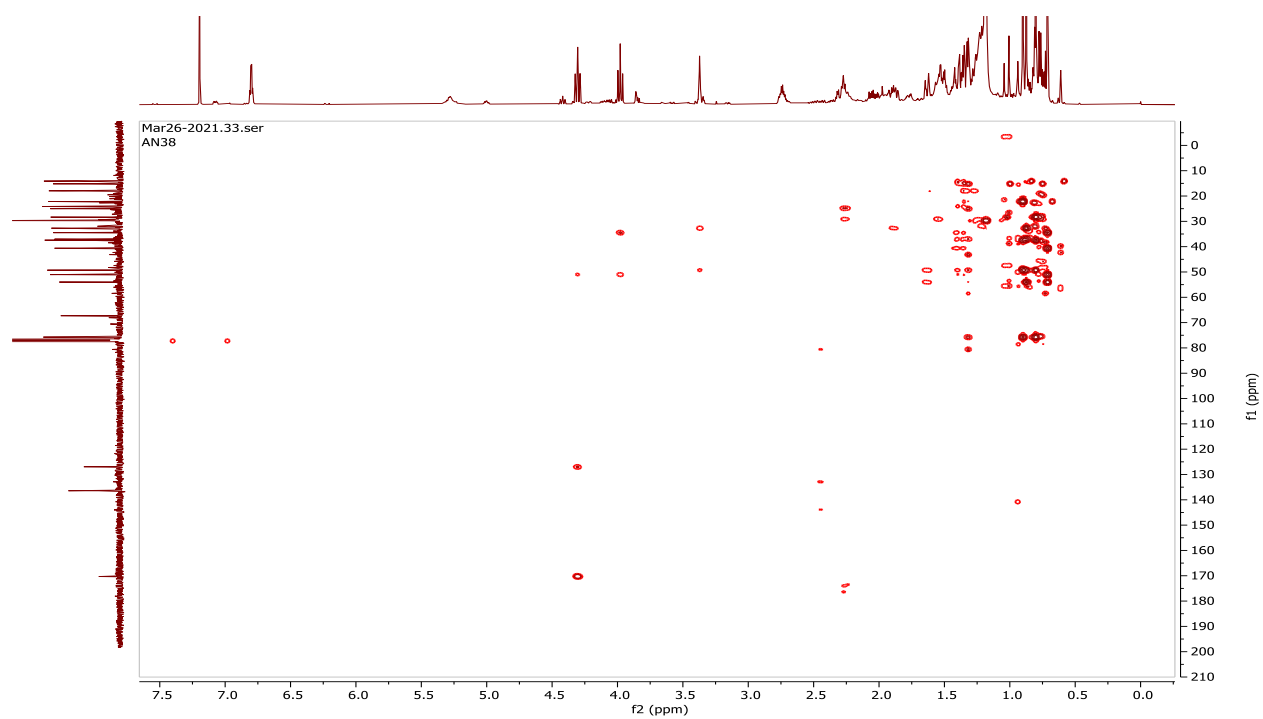

Supplement: Supplementary file 1 [file get_supplementary_file.php]
